# Supplementary material for: Climate Variations in the Low-Latitude Plateau Contribute to Different Sugarcane (Saccharum spp.) Yields and Sugar Contents in China
Source: MDPI journal article supplement (doi:10.3390/plants12142712), 2023-07-21
Supplement: s1 [file s1]

**Table s1** Summary of average ( $\pm$  standard error) annual AAT, ARH, AAR, AAS, yield, and sucrose content of the sites across all years.

| Site | Site-year | AAT/ $^{\circ}$ C         |      | ARH/%                     |      | AAR/mm                    |       | AAS/h                     |       | Yield/t                   |       | Sucrose content/%         |      |
|------|-----------|---------------------------|------|---------------------------|------|---------------------------|-------|---------------------------|-------|---------------------------|-------|---------------------------|------|
|      |           | Mean $\pm$ standard error | CV/% | Mean $\pm$ standard error | CV   | Mean $\pm$ standard error | CV/%  | Mean $\pm$ standard error | CV/%  | Mean $\pm$ standard error | CV%   | Mean $\pm$ standard error | CV   |
| S1   | 11        | 18.21 $\pm$ 0.28          | 1.52 | 79.88 $\pm$ 1.7           | 2.13 | 137.06 $\pm$ 16.72        | 12.20 | 155.42 $\pm$ 11.44        | 7.36  | 3.87 $\pm$ 0.37           | 9.68  | 14.71 $\pm$ 0.42          | 2.83 |
| S2   | 11        | 17.16 $\pm$ 0.31          | 1.83 | 71.82 $\pm$ 2.32          | 3.23 | 98.30 $\pm$ 10.41         | 10.59 | 172.09 $\pm$ 23.05        | 13.39 | 3.60 $\pm$ 0.53           | 14.35 | 14.32 $\pm$ 0.61          | 4.26 |
| S3   | 6         | 20.38 $\pm$ 0.54          | 2.67 | 76.66 $\pm$ 2.34          | 3.05 | 101.99 $\pm$ 18.79        | 18.43 | 140.99 $\pm$ 11.75        | 8.33  | 3.02 $\pm$ 0.43           | 14.30 | 13.66 $\pm$ 0.81          | 5.94 |
| S4   | 11        | 19.90 $\pm$ 0.32          | 1.58 | 71.91 $\pm$ 2.33          | 3.24 | 101.50 $\pm$ 15.50        | 15.27 | 185.33 $\pm$ 10.67        | 5.76  | 3.70 $\pm$ 0.24           | 6.36  | 14.48 $\pm$ 0.31          | 2.12 |
| S5   | 10        | 17.65 $\pm$ 0.46          | 2.59 | 76.15 $\pm$ 2.12          | 2.78 | 82.64 $\pm$ 14.40         | 17.43 | 129.67 $\pm$ 6.73         | 16.41 | 4.31 $\pm$ 1.01           | 23.65 | 13.10 $\pm$ 1.03          | 7.84 |
| S6   | 10        | 20.85 $\pm$ 0.59          | 2.82 | 72.15 $\pm$ 1.59          | 2.2  | 68.60 $\pm$ 9.99          | 14.56 | 168.22 $\pm$ 15.80        | 9.39  | 3.44 $\pm$ 0.64           | 18.52 | 14.61 $\pm$ 0.47          | 4.71 |
| S7   | 3         | 18.37                     |      | 82.07                     |      | 187.58                    |       | 162.2                     |       | 4.61                      |       | 14.41                     |      |
| S8   | 9         | 19.26 $\pm$ 0.63          | 3.28 | 72.94 $\pm$ 2.53          | 3.47 | 86.65 $\pm$ 17.45         | 19.69 | 173.48 $\pm$ 21.37        | 12.32 | 3.48 $\pm$ 0.57           | 16.39 | 13.97 $\pm$ 0.57          | 4.06 |
| S9   | 9         | 20.93 $\pm$ 0.30          | 1.42 | 73.37 $\pm$ 2.93          | 4.00 | 98.24 $\pm$ 12.18         | 12.40 | 181.29 $\pm$ 15.77        | 8.70  | 2.66 $\pm$ 0.74           | 20.23 | 14.26 $\pm$ 0.48          | 3.34 |
| S10  | 10        | 20.19 $\pm$ 0.29          | 1.43 | 75.90 $\pm$ 2.51          | 3.31 | 135.67 $\pm$ 13.60        | 10.02 | 186.00 $\pm$ 12.71        | 6.83  | 3.12 $\pm$ 0.40           | 12.82 | 14.21 $\pm$ 0.41          | 2.91 |
| S11  | 10        | 18.66 $\pm$ 0.20          | 1.05 | 76.77 $\pm$ 2.13          | 2.78 | 104.68 $\pm$ 17.72        | 16.93 | 195.51 $\pm$ 18.25        | 9.34  | 4.21 $\pm$ 0.57           | 13.55 | 13.90 $\pm$ 0.60          | 4.32 |
| S12  | 11        | 18.23 $\pm$ 0.18          | 0.98 | 68.17 $\pm$ 2.27          | 3.33 | 89.14 $\pm$ 11.48         | 12.88 | 197.79 $\pm$ 16.38        | 8.28  | 3.42 $\pm$ 0.28           | 8.05  | 14.53 $\pm$ 0.37          | 2.56 |
| S13  | 11        | 19.58 $\pm$ 0.19          | 0.98 | 76.37 $\pm$ 2.50          | 3.28 | 113.46 $\pm$ 17.15        | 15.12 | 184.32 $\pm$ 20.30        | 11.01 | 4.75 $\pm$ 0.52           | 11.00 | 14.45 $\pm$ 0.44          | 3.02 |
| S14  | 10        | 20.32 $\pm$ 0.26          | 1.26 | 75.27 $\pm$ 1.69          | 2.25 | 124.48 $\pm$ 16.20        | 13.01 | 174.18 $\pm$ 5.50         | 3.15  | 4.08 $\pm$ 0.41           | 10.05 | 14.15 $\pm$ 0.37          | 2.58 |
| S15  | 11        | 19.46 $\pm$ 0.43          | 2.23 | 77.25 $\pm$ 2.63          | 3.41 | 108.18 $\pm$ 9.86         | 9.11  | 162.83 $\pm$ 9.85         | 6.05  | 4.09 $\pm$ 0.57           | 13.98 | 14.03 $\pm$ 2.85          | 2.85 |
| S16  | 10        | 22.04 $\pm$ 0.32          | 1.47 | 79.96 $\pm$ 1.06          | 1.33 | 128.59 $\pm$ 14.52        | 11.29 | 165.78 $\pm$ 17.98        | 10.85 | 3.02 $\pm$ 0.35           | 11.54 | 14.52 $\pm$ 0.39          | 2.66 |
| S17  | 11        | 20.39 $\pm$ 0.20          | 0.96 | 81.64 $\pm$ 0.82          | 1.01 | 108.44 $\pm$ 14.54        | 13.41 | 182.17 $\pm$ 14.53        | 7.98  | 4.01 $\pm$ 0.61           | 15.33 | 15.09 $\pm$ 1.03          | 6.8  |
| S18  | 9         | 21.03 $\pm$ 0.28          | 1.34 | 74.39 $\pm$ 2.92          | 3.93 | 111.43 $\pm$ 11.75        | 10.55 | 192.57 $\pm$ 15.86        | 8.24  | 4.89 $\pm$ 0.32           | 6.62  | 15.11 $\pm$ 0.41          | 2.7  |
| S19  | 9         | 18.05 $\pm$ 0.40          | 2.23 | 66.06 $\pm$ 2.36          | 3.58 | 73.31 $\pm$ 11.50         | 15.69 | 193.80 $\pm$ 14.47        | 7.47  | 3.13 $\pm$ 0.51           | 16.18 | 14.87 $\pm$ 0.67          | 4.49 |
| S20  | 10        | 18.42 $\pm$ 0.57          | 3.11 | 71.48 $\pm$ 2.22          | 3.11 | 69.03 $\pm$ 11.03         | 15.97 | 179.56 $\pm$ 11.33        | 6.31  | 3.91 $\pm$ 1.29           | 32.95 | 14.27 $\pm$ 0.68          | 4.75 |
| S21  | 11        | 20.18 $\pm$ 0.25          | 1.25 | 71.54 $\pm$ 2.92          | 4.08 | 78.77 $\pm$ 10.48         | 13.30 | 208.33 $\pm$ 13.90        | 6.67  | 4.01 $\pm$ 0.30           | 7.39  | 14.56 $\pm$ 0.26          | 1.77 |
| S22  | 3         | 18.63                     |      | 74.00                     |      | 79.85                     |       | 176.86                    |       | 4.00                      |       | 13.47                     |      |
| S23  | 11        | 19.61 $\pm$ 0.25          | 12.6 | 77.64 $\pm$ 1.52          | 16.6 | 153.19 $\pm$ 9.00         | 5.87  | 172.74 $\pm$ 10.64        | 6.16  | 3.30 $\pm$ 1.31           | 39.59 | 13.96 $\pm$ 0.49          | 3.48 |
| S24  | 11        | 20.37 $\pm$ 0.20          | 0.99 | 74.15 $\pm$ 2.21          | 2.98 | 114.78 $\pm$ 20.09        | 17.51 | 196.07 $\pm$ 15.72        | 8.02  | 4.62 $\pm$ 0.33           | 7.22  | 14.56 $\pm$ 0.53          | 3.67 |
| S25  | 11        | 20.55 $\pm$ 0.38          | 1.86 | 68.06 $\pm$ 2.36          | 3.46 | 67.98 $\pm$ 15.41         | 22.67 | 194.90 $\pm$ 18.31        | 9.39  | 3.43 $\pm$ 0.62           | 18.16 | 14.27 $\pm$ 0.55          | 3.86 |
| S26  | 10        | 20.03 $\pm$ 0.36          | 1.80 | 77.33 $\pm$ 1.45          | 1.88 | 128.54 $\pm$ 16.52        | 12.85 | 169.65 $\pm$ 11.48        | 6.77  | 3.36 $\pm$ 0.29           | 8.62  | 14.64 $\pm$ 0.40          | 2.71 |

Footnote: AAT, Average air temperature; ARH, Average relative humidity; ARA, Average rainfall amount; ASD, Average sunshine duration.

Table s2 Summary of average ( $\pm$  standard error) AAT, ARH, AAR, AAS, yield, and sucrose content of the sites across all years.

| Crop /Year | Year-Site | AAT/ $^{\circ}$ C      |       |      | ARH/%                  |       |      | AAR/mm                       |       | AAS/h                        |       | Yield/t                |       |       | Sucrose content/%      |       |       |
|------------|-----------|------------------------|-------|------|------------------------|-------|------|------------------------------|-------|------------------------------|-------|------------------------|-------|-------|------------------------|-------|-------|
|            |           | Mean<br>standard error | $\pm$ | CV/% | Mean<br>standard error | $\pm$ | CV   | Mean $\pm$ standard<br>error | CV/%  | Mean $\pm$ standard<br>error | CV/%  | Mean<br>standard error | $\pm$ | CV/%  | Mean<br>standard error | $\pm$ | CV    |
| 2005/2006  | 25        | 19.63 $\pm$ 1.11       |       | 5.65 | 74.58 $\pm$ 4.45       |       | 5.96 | 97.78 $\pm$ 31.27            | 31.98 | 173.91 $\pm$ 19.95           | 11.47 | 3.75 $\pm$ 0.71        |       | 19.43 | 14.05 $\pm$ 0.80       |       | 5.72  |
| 2006/2007  | 24        | 19.45 $\pm$ 1.19       |       | 6.11 | 74.82 $\pm$ 3.85       |       | 5.14 | 107.51 $\pm$ 31.99           | 29.76 | 175.26 $\pm$ 22.49           | 12.83 | 3.68 $\pm$ 1.31        |       | 3.36  | 14.03 $\pm$ 0.49       |       | 3.50  |
| 2007/2008  | 26        | 19.07 $\pm$ 1.24       |       | 6.52 | 74.98 $\pm$ 3.66       |       | 4.88 | 114.63 $\pm$ 27.23           | 23.76 | 167.89 $\pm$ 19.29           | 11.49 | 3.87 $\pm$ 0.72        |       | 18.63 | 14.05 $\pm$ 0.60       |       | 4.30  |
| 2008/2009  | 26        | 19.37 $\pm$ 1.17       |       | 6.04 | 74.80 $\pm$ 4.23       |       | 5.65 | 110.67 $\pm$ 30.53           | 27.58 | 161.78 $\pm$ 22.46           | 13.88 | 3.78 $\pm$ 0.60        |       | 15.76 | 14.60 $\pm$ 0.54       |       | 3.70  |
| 2009/2010  | 23        | 19.65 $\pm$ 1.15       |       | 5.85 | 71.69 $\pm$ 5.73       |       | 7.99 | 90.93 $\pm$ 30.14            | 33.15 | 178.30 $\pm$ 22.38           | 12.55 | 3.94 $\pm$ 1.32        |       | 33.43 | 14.80 $\pm$ 0.44       |       | 2.96  |
| 2010/2011  | 25        | 19.76 $\pm$ 1.20       |       | 6.07 | 74.22 $\pm$ 5.09       |       | 6.86 | 107.66 $\pm$ 36.91           | 34.29 | 172.32 $\pm$ 25.85           | 15.00 | 3.54 $\pm$ 0.77        |       | 21.82 | 14.21 $\pm$ 0.56       |       | 3..96 |
| 2011/2012  | 24        | 19.53 $\pm$ 1.12       |       | 5.74 | 75.95 $\pm$ 5.00       |       | 6.59 | 104.87 $\pm$ 30.74           | 29.31 | 180.07 $\pm$ 25.39           | 14.10 | 3.57 $\pm$ 0.75        |       | 21.13 | 14.42 $\pm$ 0.63       |       | 4.40  |
| 2012/2013  | 24        | 19.96 $\pm$ 1.26       |       | 6.29 | 73.45 $\pm$ 5.13       |       | 6.98 | 95.00 $\pm$ 32.53            | 34.24 | 188.81 $\pm$ 22.93           | 12.14 | 3.53 $\pm$ 0.73        |       | 20.74 | 14.52 $\pm$ 0.91       |       | 6.30  |
| 2013/2014  | 25        | 19.41 $\pm$ 1.19       |       | 6.15 | 73.66 $\pm$ 5.04       |       | 6.85 | 111.67 $\pm$ 34.35           | 30.76 | 187.91 $\pm$ 17.21           | 9.16  | 3.76 $\pm$ 0.71        |       | 18.9  | 14.00 $\pm$ 1.10       |       | 7.85  |
| 2014/2015  | 24        | 19.81 $\pm$ 5.98       |       | 5.98 | 74.64 $\pm$ 5.36       |       | 7.18 | 108.99 $\pm$ 33.84           | 31.05 | 192.02 $\pm$ 21.06           | 10.97 | 3.78 $\pm$ 0.74        |       | 19.51 | 14.27 $\pm$ 0.64       |       | 4.48  |
| 2015/2016  | 26        | 19.71 $\pm$ 1.19       |       | 6.06 | 76.07 $\pm$ 4.52       |       | 5.95 | 109.33 $\pm$ 31.92           | 29.19 | 173.24 $\pm$ 13.67           | 7.89  | 3.81 $\pm$ 0.69        |       | 18.10 | 14.16 $\pm$ 0.83       |       | 5.87  |

Footnote: AAT, Average air temperature; ARH, Average relative humidity; ARA, Average rainfall amount; ASD, Average sunshine duration.
